# Supplementary material
Source: HighWire-hosted journal article supplement (https://bmjopen.bmj.com/content/14/4/e083550)
Supplement: inline-supplementary-material-2 [file inline-supplementary-material-2.pdf]

**Supplemental Table 1 Major birth defects in GLP1-RA and the diabetic and overweight/obese reference groups, concomitant medications, and maternal conditions**

| <b>Major birth defects in GLP1-RA exposed pregnancies</b>                                                                                                                                                                       | <b>Outcome</b> | <b>GA at birth / pregnancy loss<sup>§</sup></b> | <b>GLP1-RA (dose) / indication</b>                     | <b>Exposure<sup>§</sup></b> | <b>Concomitant medications and pre-/pregnancy supplements (GA of exposure)</b> | <b>Maternal conditions</b>                                                             |
|---------------------------------------------------------------------------------------------------------------------------------------------------------------------------------------------------------------------------------|----------------|-------------------------------------------------|--------------------------------------------------------|-----------------------------|--------------------------------------------------------------------------------|----------------------------------------------------------------------------------------|
| Ventricular septal defect                                                                                                                                                                                                       | Live birth     | 38                                              | Liraglutide (unknown) / Weight loss                    | 0-6                         | folate (6-12)                                                                  | Obesity (BMI 34 kg/m <sup>2</sup> ), gestational diabetes                              |
| Ectopic kidney                                                                                                                                                                                                                  | Live birth     | 38                                              | Semaglutide (1 mg/wk) / Weight loss                    | 0-4                         | methylphenidate (until week 6), folate (started before pregnancy)              | Endometriosis, ADHD, alcohol (< 1 drink/day, timing unknown), BMI 25 kg/m <sup>2</sup> |
| Multiple (brain, hands and heart) anomalies (nothing was found post mortem to suggest genetic or cytogenetic finding)                                                                                                           | TOP            | 17                                              | Liraglutide (unknown) / Weight loss                    | 0-5                         | folate (started before pregnancy)                                              | Overweight (BMI 27 kg/m <sup>2</sup> )                                                 |
| <b>Major birth defects in diabetic patients pregnancies</b>                                                                                                                                                                     | <b>Outcome</b> |                                                 | <b>Antidiabetic drugs / indication</b>                 |                             | <b>Concomitant medications and pre-/pregnancy supplements (GA of exposure)</b> | <b>Maternal conditions</b>                                                             |
| Club foot                                                                                                                                                                                                                       | Live birth     | 38                                              | Metformin 1700 mg/d diabetes                           | 0-7                         | folate (started before pregnancy), aluminium hydroxide*                        | Borderline personality, polycystic ovaries, obesity (BMI 40 kg/m <sup>2</sup> )        |
| Polymalformative syndrome (holoprosencephaly, rib deformity, corpus callosum agenesis, patent foramen ovale, hemivertebra, renal agenesis, spine malformation, ventricular septal defect, congenital disorder of glycosylation) | Live birth     | 40                                              | Sitagliptin 100 mg/d, dapagliflozine, insulin diabetes | 0-6<br>0-6<br>6-40          | folate (started at 6 weeks), levothyroxine (0-40)                              | obesity (BMI 40 kg/m <sup>2</sup> ), hypothyroidism, tobacco (< 5 cig/day)             |
| Spina bifida & other anomalies typical of diabetes                                                                                                                                                                              | TOP            | 18                                              | Metformin 2550 mg/d, glimepiride, insulin, diabetes    | 0-6<br>0-5<br>0-40          | losartan (0-5), simvastatin (0-5)                                              | Multiple sclerosis, arterial hypertension                                              |

|                                                                                                                        |                |    |  |  |                                                                                                                                                                   | n, obesity (BMI 34 kg/m <sup>2</sup> )              |
|------------------------------------------------------------------------------------------------------------------------|----------------|----|--|--|-------------------------------------------------------------------------------------------------------------------------------------------------------------------|-----------------------------------------------------|
| <b>Major birth defects in overweight/obese patients pregnancies</b>                                                    | <b>Outcome</b> |    |  |  | <b>Concomitant medications</b>                                                                                                                                    | <b>Maternal conditions</b>                          |
| Tetralogy of Fallot                                                                                                    | Live birth     | 36 |  |  | paracetamol (0-40), dipyron <sup>*</sup> , passiflora valerian <sup>*</sup> , thiamine <sup>*</sup> , pyridoxine <sup>*</sup> , folate (started before pregnancy) | Overweight (BMI 28 kg/m <sup>2</sup> )              |
| Double outlet ventricle                                                                                                | TOP            | 17 |  |  | escitalopram (0-17) acetylsalicylic acid 1000 mg <sup>*</sup> , folate (started before pregnancy), dental X-ray (6)                                               | Obesity (BMI 30 kg/m <sup>2</sup> ), migraine       |
| Acrania                                                                                                                | TOP            | 15 |  |  | sulpiride (0-15), acetazolamide oral (0-15), esomeprazole (0-15), folate (started before pregnancy)                                                               | Obesity (BMI 46 kg/m <sup>2</sup> ), schizophrenia  |
| Biliary atresia                                                                                                        | TOP            | 22 |  |  | thyroxine (4-22), cefuroxime (7-8), influenza vaccination (14), folate (from beginning of pregnancy)                                                              | Obesity (BMI 36 kg/m <sup>2</sup> ), hypothyroidism |
| Oligohydramnios on early detailed U/S, urinary bladder distention/dilatation, compatible with posterior urethral valve | TOP            | 17 |  |  | budesonide and formoterol (6-17), folate (started before pregnancy)                                                                                               | Overweight (BMI 29 kg/m <sup>2</sup> ), asthma      |
| * sometime in pregnancy, <sup>s</sup> weeks of gestation, GA : gestational age; TOP: termination of pregnancy          |                |    |  |  |                                                                                                                                                                   |                                                     |
